# Supplementary material for: Single Donor FMT Reverses Microbial/Immune Dysbiosis and Induces Clinical Remission in a Rat Model of Acute Colitis
Source: MDPI journal article supplement (doi:10.3390/pathogens10020152), 2021-02-02
Supplement: s1 [file s1]

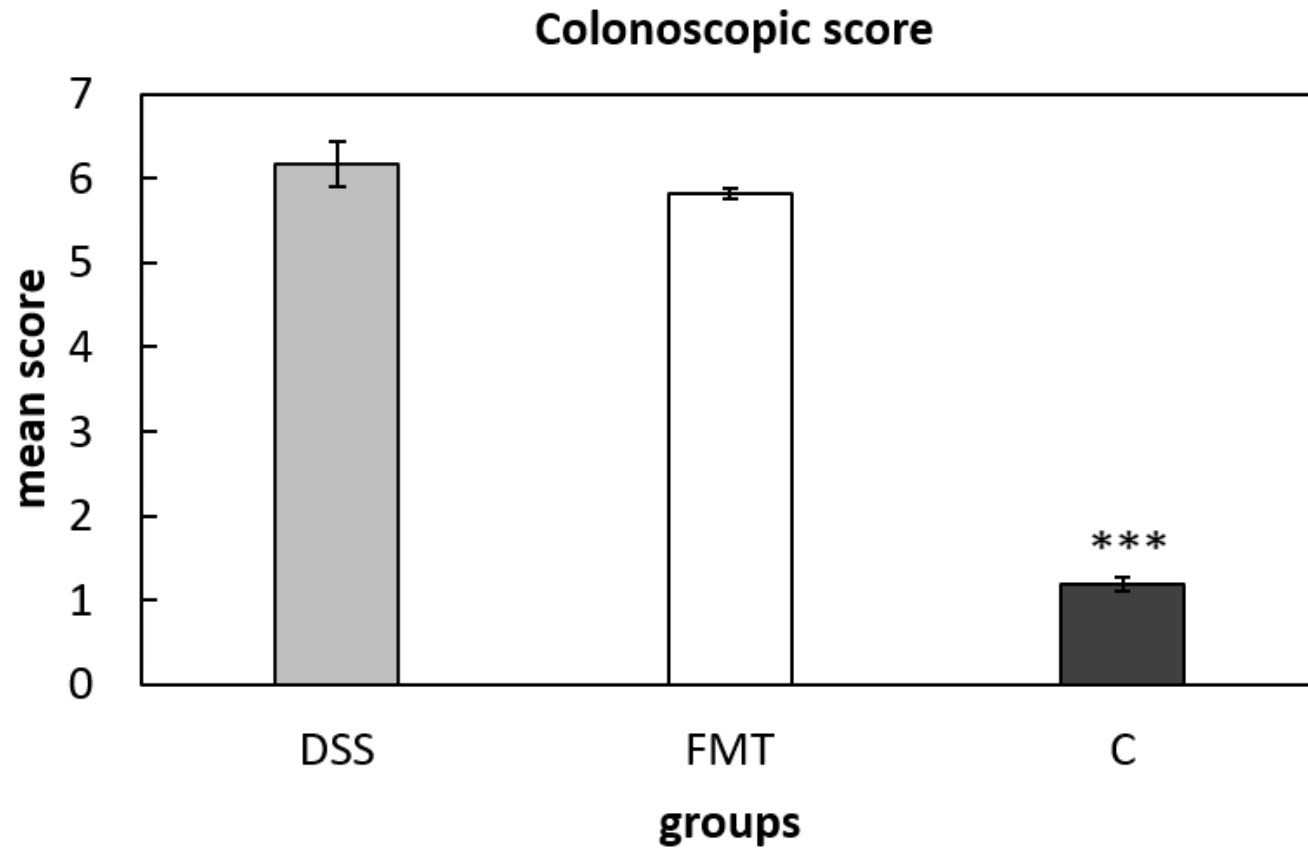

**Figure S1.** Colonoscopic score. Data are expressed as mean  $\pm$  SEM (\*\* $p < 0.001$  vs. all other groups). DSS – dextran sulfate sodium induced colitis (positive control); FMT – DSS-induced colitis with subsequent FMT treatment; C – healthy control.
